# Supplementary material
Source: PubMed Central journal article supplement (PMC7493308)
Supplement: cs9b02139_si_001.pdf [file cs9b02139_si_001.pdf]

# Supporting Information

## Pt/ZrO<sub>2</sub> Prepared by Atomic Trapping: an Efficient Catalyst for the Conversion of Glycerol to Lactic Acid with Concomitant Transfer Hydrogenation of Cyclohexene

*Zhenchen Tang,<sup>a</sup> Pei Liu,<sup>b</sup> Huatang Cao,<sup>c</sup> Sara Bals,<sup>b</sup> Hero J. Heeres<sup>a</sup> and Paolo P. Pescarmona<sup>a,\*</sup>*

<sup>a</sup> Chemical Engineering Group, Engineering and Technology Institute Groningen, University of Groningen, Nijenborgh 4, 9747 AG Groningen, The Netherlands

<sup>b</sup> Electron Microscopy for Material Science, University of Antwerp, Groenenborgerlaan 171, 2020 Antwerp, Belgium

<sup>c</sup> Advanced Production Engineering Group, Engineering and Technology Institute Groningen, University of Groningen, Nijenborgh 4, 9747AG, the Netherlands

\*Corresponding Author. E-mail: p.p.pescarmona@rug.nl

This Supporting Information contains 9 pages including 8 Figures and 5 Tables.

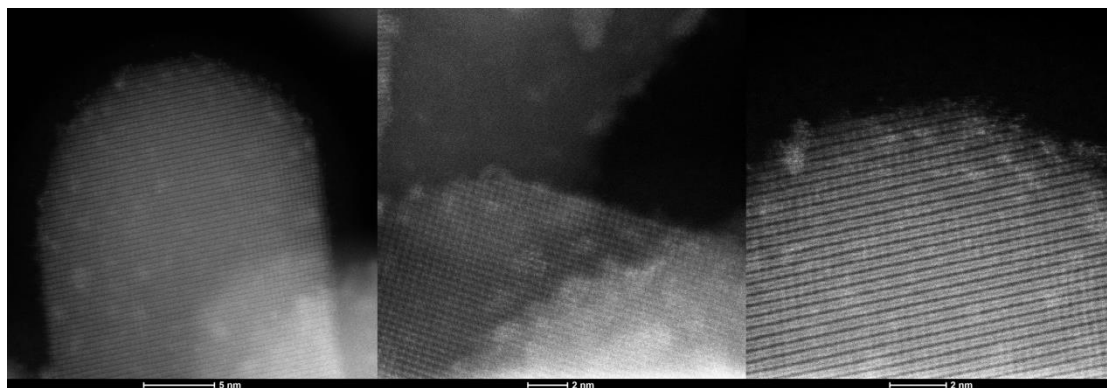

**Figure S1.** Supplementary HAADF-STEM images for 2Pt/ZrO<sub>2</sub>-550.

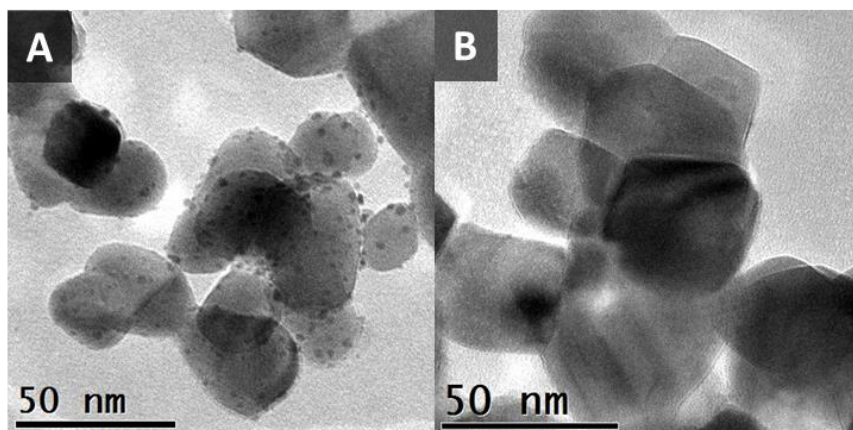

**Figure S2.** TEM images of 2Pt/ZrO<sub>2</sub> catalysts calcined and reduced with different procedures.

(A) 2Pt/ZrO<sub>2</sub>-400-R250, average particle size of Pt: 2.0 nm; (B) 2Pt/ZrO<sub>2</sub>-800-R250.

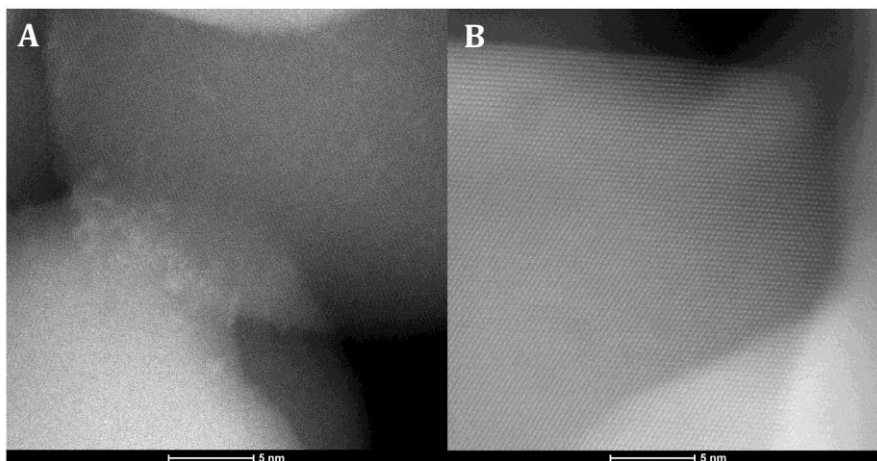

**Figure S3.** HAADF-STEM images of 0.5Pt/ZrO<sub>2</sub> catalysts calcined at different temperatures. (A) 0.5Pt/ZrO<sub>2</sub>-550; (B) 0.5Pt/ZrO<sub>2</sub>-800.

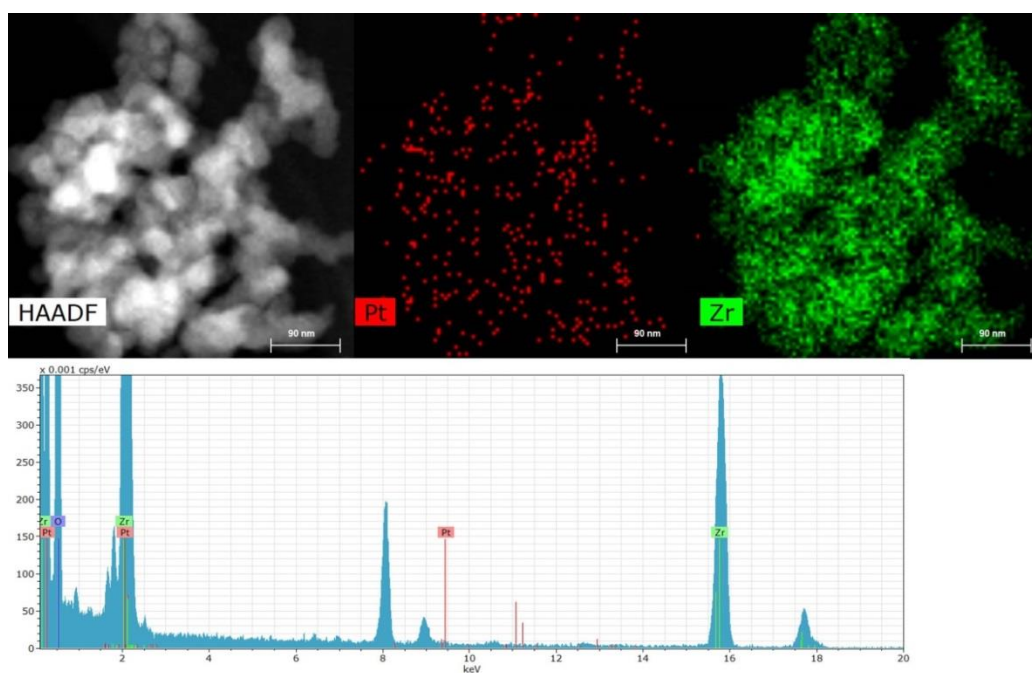

**Figure S4.** HAADF-STEM images coupled with EDX-mapping for 0.5Pt/ ZrO<sub>2</sub>-800. Note: the red spots in the EDX-mapping of Pt might be caused by noise and not represent actual Pt species. This EDX-mapping of Pt is shown with the purpose of demonstrating the absence of large Pt nanoparticles in this sample.

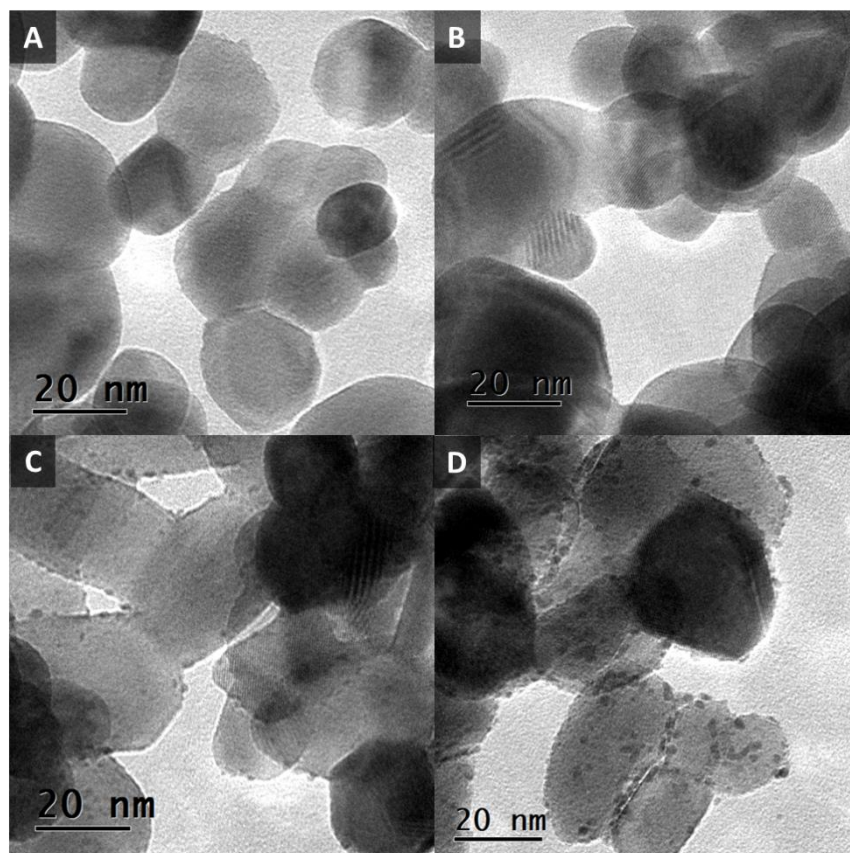

**Figure S5.** TEM images of Pt/ZrO<sub>2</sub> catalysts with different loading after calcination at 550 °C. (A) 0.5Pt/ZrO<sub>2</sub>-550; (B) 1Pt/ZrO<sub>2</sub>-550; (C) 5Pt/ZrO<sub>2</sub>-550, average particle size of Pt: 1.3 nm; (D) 9Pt/ZrO<sub>2</sub>-550, average particle size of Pt: 1.5 nm. Note: the resolution of these TEM images does not allow identification of nanoparticles < 0.5 nm.



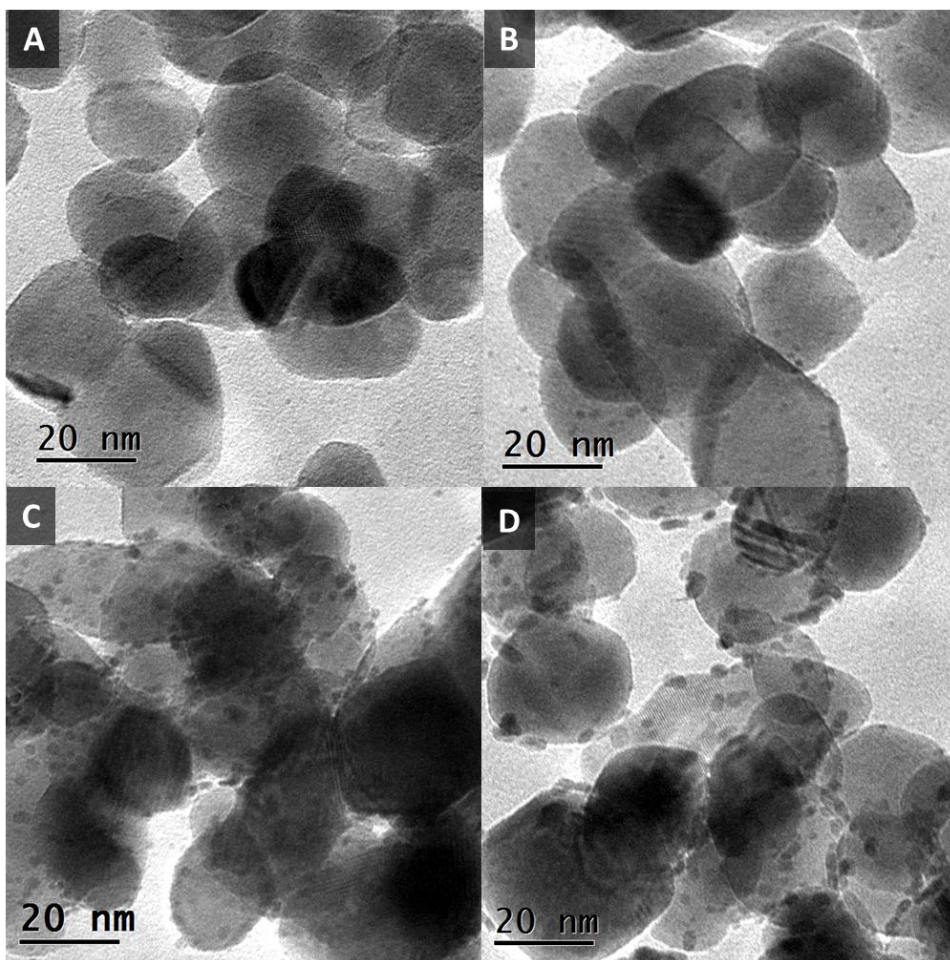

**Figure S6.** TEM images of Pt/ZrO<sub>2</sub> catalysts with different loading after calcination at 550 °C and reduction at 250 °C. (A) 0.5Pt/ZrO<sub>2</sub>-550, average particle size of Pt: 0.8 nm; (B) 1Pt/ZrO<sub>2</sub>-550, average particle size of Pt: 1.2 nm; (C) 5Pt/ZrO<sub>2</sub>-550, average particle size of Pt: 2.0 nm; (D) 9Pt/ZrO<sub>2</sub>-550, average particle size of Pt: 2.6 nm.

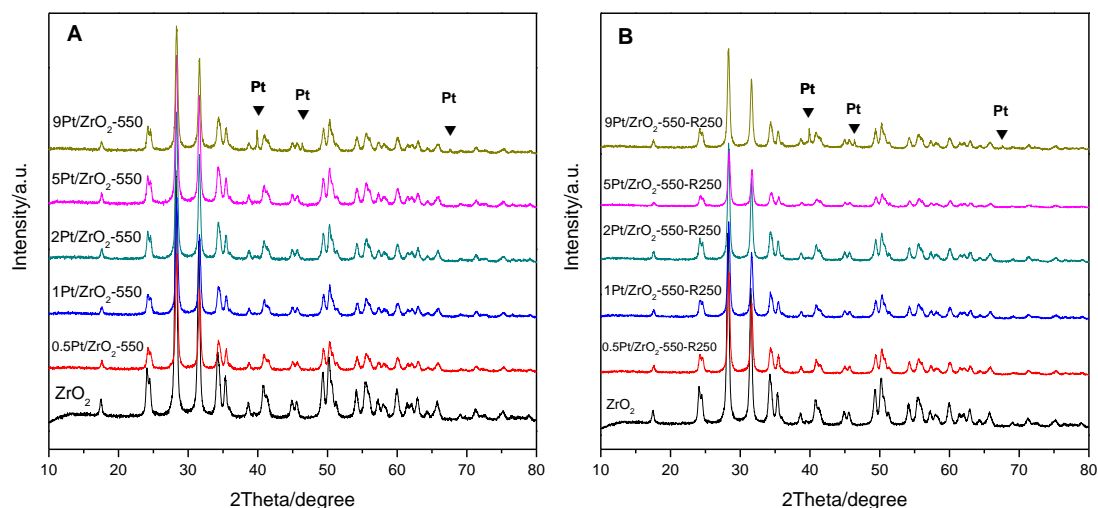

**Figure S7.** XRD patterns of calcined ZrO<sub>2</sub> and Pt/ZrO<sub>2</sub> catalysts with various Pt loadings (0.5-9%), before (A) and after reduction (B).

**Table S1.** Catalytic conversion of glycerol to lactic acid using Pt catalysts supported on different oxides.<sup>a</sup>

| Entry | Catalyst                       | Conv. GLY (%) | Y <sub>LA</sub> (%) | S <sub>(transfer-H)</sub> (%) | Selectivity in the conversion of glycerol (%) |               |               |              | Yield in the conversion of cyclohexene (%) <sup>b</sup> |         |
|-------|--------------------------------|---------------|---------------------|-------------------------------|-----------------------------------------------|---------------|---------------|--------------|---------------------------------------------------------|---------|
|       |                                |               |                     |                               | Lactic acid                                   | Glyceric acid | Glycolic acid | Propane-diol | Cyclohexane                                             | Benzene |
| 1     | 2Pt/TiO <sub>2</sub> -550-R250 | 9.4           | 8.6                 | 28                            | 91                                            | 1.0           | 0             | 2.0          | 1.3                                                     | 0       |
| 2     | 2Pt/ZrO <sub>2</sub> -550-R250 | 96            | 95                  | 36                            | 99                                            | 0.5           | 0.2           | 0.7          | 17                                                      | 0       |
| 3     | 2Pt/CeO <sub>2</sub> -800-R250 | 90            | 88                  | 45                            | 98                                            | 0.5           | 0             | 0.5          | 20                                                      | 0       |

<sup>a</sup> Reaction conditions: aqueous glycerol solution: 10 mmol (0.5 M, 20 mL); cyclohexene: 20 mmol; nominal Pt/glycerol ratio = 1/1950; NaOH: 15 mmol; temperature: 160°C; reaction time: 4.5 h; N<sub>2</sub> pressure: 20 bar. <sup>b</sup> Under the employed reaction conditions (mol<sub>glycerol</sub> : mol<sub>cyclohexene</sub> = 1 : 2) the maximum theoretical yield of cyclohexane is 50%.

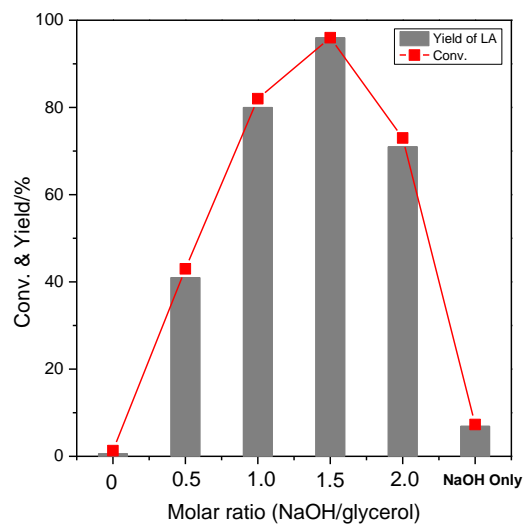

**Figure S8.** Effect of the amount of NaOH on the catalytic performance of 2Pt/ZrO<sub>2</sub>-550-R250.

Reaction conditions: aqueous glycerol solution: 10 mmol (0.5 M, 20 mL); cyclohexene: 20 mmol; nominal Pt/glycerol ratio = 1/1950; NaOH: 15 mmol; temperature: 160°C; reaction time: 4.5 h; N<sub>2</sub> pressure: 20 bar.

**Table S2.** Catalytic conversion of glycerol to lactic acid using a Pt/ZrO<sub>2</sub> catalyst at different reaction temperature.

| Entry | Catalyst                       | Temp. (°C) | Conv.GLY (%) | Y <sub>LA</sub> (%) | S <sub>(transfer-H)</sub> (%) | Selectivity in the conversion of glycerol (%) |               |               |              | Yield in the conversion of cyclohexene (%) <sup>a</sup> |         |
|-------|--------------------------------|------------|--------------|---------------------|-------------------------------|-----------------------------------------------|---------------|---------------|--------------|---------------------------------------------------------|---------|
|       |                                |            |              |                     |                               | Lactic acid                                   | Glyceric acid | Glycolic acid | Propane-diol | Cyclohexane                                             | Benzene |
| 1     | 2Pt/ZrO <sub>2</sub> -550-R250 | 120        | 25           | 24                  | 62                            | 96                                            | 0.2           | 0.2           | 0.4          | 7.5                                                     | 0.4     |
| 2     | 2Pt/ZrO <sub>2</sub> -550-R250 | 140        | 40           | 39                  | 69                            | 95                                            | 0.4           | 0.2           | 0.9          | 14                                                      | 0       |
| 3     | 2Pt/ZrO <sub>2</sub> -550-R250 | 160        | 96           | 95                  | 36                            | 99                                            | 0.5           | 0.2           | 0.7          | 17                                                      | 0       |
| 4     | 2Pt/ZrO <sub>2</sub> -550-R250 | 180        | > 99         | 97                  | 47                            | 97                                            | 0.7           | 0.6           | 1.8          | 23                                                      | 0       |

Reaction conditions: aqueous glycerol solution: 10 mmol (0.5 M, 20 mL); cyclohexene: 20 mmol; nominal Pt/glycerol ratio = 1/1950; NaOH: 15 mmol; reaction time: 4.5 h; N<sub>2</sub> pressure: 20 bar. <sup>a</sup> Under the employed reaction conditions (mol<sub>glycerol</sub> : mol<sub>cyclohexene</sub> = 1 : 2) the maximum theoretical yield of cyclohexane is 50%.

**Table S3.** Catalytic conversion of glycerol to lactic acid using a Pt/ZrO<sub>2</sub> catalyst, as a function of the presence of cyclohexene.

| Entry | Catalyst                       | Cyclohexene (mmol) | Conv.GLY (%) | Y <sub>LA</sub> (%) | S <sub>(transfer-H)</sub> (%) | Selectivity in the conversion of glycerol (%) |               |               |              | Yield in the conversion of cyclohexene (%) <sup>a</sup> |         |
|-------|--------------------------------|--------------------|--------------|---------------------|-------------------------------|-----------------------------------------------|---------------|---------------|--------------|---------------------------------------------------------|---------|
|       |                                |                    |              |                     |                               | Lactic acid                                   | Glyceric acid | Glycolic acid | Propane-diol | Cyclohexane                                             | Benzene |
| 1     | 2Pt/ZrO <sub>2</sub> -550-R250 | 20                 | 40           | 39                  | 69                            | 95                                            | 0.4           | 0.2           | 0.9          | 14                                                      | 0       |
| 2     | 2Pt/ZrO <sub>2</sub> -550-R250 | none               | 39           | 38                  | n.a.                          | 97                                            | 1.0           | 0.4           | 1.6          | n.a.                                                    | n.a.    |

Reaction conditions: aqueous glycerol solution: 10 mmol (0.5 M, 20 mL); cyclohexene: 20 mmol; nominal Pt/glycerol ratio = 1/1950; NaOH: 15 mmol; temperature: 140°C; reaction time: 4.5 h; N<sub>2</sub> pressure: 20 bar. <sup>a</sup> Under the employed reaction conditions (mol<sub>glycerol</sub> : mol<sub>cyclohexene</sub> = 1 : 2) the maximum theoretical yield of cyclohexane is 50%.



**Table S4.** Catalytic conversion of glycerol to lactic acid using 2Pt/ZrO<sub>2</sub> 550-R250.<sup>a</sup>

| Entry | Catalyst                       | Conv.GLY (%) | Y <sub>LA</sub> (%) | Selectivity in the conversion of glycerol (%) |               |               |              | Yield in the gas phase (%) <sup>b</sup> |
|-------|--------------------------------|--------------|---------------------|-----------------------------------------------|---------------|---------------|--------------|-----------------------------------------|
|       |                                |              |                     | Lactic acid                                   | Glyceric acid | Glycolic acid | Propane-diol | H <sub>2</sub>                          |
| 1     | 2Pt/ZrO <sub>2</sub> -550-R250 | 96           | 94                  | 98                                            | 0             | 0             | 0.5          | 98                                      |

<sup>a</sup> Reaction conditions: aqueous glycerol solution: 30 mmol (1.0 M, 30 mL); nominal Pt/glycerol ratio = 1/1950; NaOH: 40 mmol; temperature: 160°C; reaction time: 4.5 h; N<sub>2</sub> pressure: 3 bar. <sup>b</sup> Around 10 bar H<sub>2</sub> (77% in the H<sub>2</sub> and N<sub>2</sub> mixture) was detected after reaction, corresponding to a volume of 65 mL. The moles of H<sub>2</sub> were calculated assuming an ideal gas behavior ( $pV = nRT$ ) at 298 K.

**Table S5.** Catalytic conversion of glycerol over 2Pt/ZrO<sub>2</sub>-550-R250 in the presence of 1-decene or 1-decyne as hydrogen acceptor.<sup>a</sup>

| Entry | Hydrogen Acceptors | Conv.GLY (%) | Y <sub>LA</sub> (%) | S <sub>(transfer-H)</sub> (%) | Selectivity in the conversion of glycerol (%) |               |               |              | Yield in the conversion of hydrogen acceptors (%) <sup>b</sup> |        |
|-------|--------------------|--------------|---------------------|-------------------------------|-----------------------------------------------|---------------|---------------|--------------|----------------------------------------------------------------|--------|
|       |                    |              |                     |                               | Lactic acid                                   | Glyceric acid | Glycolic acid | Propane-diol | Decene                                                         | Decane |
| 1     | 1-decene           | 97           | 96                  | 92                            | 99                                            | 0.7           | 0.1           | 0.1          | -                                                              | 45     |
| 2     | 1-decyne           | 1.3          | 1.2                 | n.a.                          | 94                                            | 2.5           | 0             | 0.3          | n.a.                                                           | n.a.   |

<sup>a</sup> Reaction conditions: aqueous glycerol solution: 10 mmol (0.5 M, 20 mL); hydrogen acceptors: 20 mmol; nominal Pt/glycerol ratio = 1/1950; NaOH: 15 mmol; temperature: 160°C; reaction time: 4.5 h; N<sub>2</sub> pressure: 20 bar. <sup>b</sup> Under the employed reaction conditions ( $\text{mol}_{\text{glycerol}} : \text{mol}_{\text{decene}} = 1 : 2$ ) the maximum theoretical yield of decane is 50%. n.a. = not available.
